# Supplementary material for: Multifunctional NaYF4:Nd/NaDyF4 nanocrystals as a multimodal platform for NIR-II fluorescence and magnetic resonance imaging
Source: Royal Society of Chemistry journal article supplement (doi:10.1039/d0na00846j), 2020-12-10
Supplement: d0na00846j1.pdf [file d0na00846j1.pdf]

## Electronic Supplementary Information for

# Multifunctional NaYF<sub>4</sub>:Nd/NaDyF<sub>4</sub> Nanocrystals as Multimodal Platform for NIR- II Fluorescence and Magnetic Resonance Imaging

Junwei Zhao,<sup>b,c†</sup> Huishan Hu,<sup>c†</sup> Wenquan Liu,<sup>a</sup> and Xin Wang<sup>\*a</sup>

<sup>a</sup> Henan Key Laboratory of Photovoltaic Materials, Henan University, Kaifeng 475004, P. R. China.

<sup>b</sup> Materials Science and Engineering School & Henan Key Laboratory of Special Protective Materials, Luoyang Institute of Science and Technology, Luoyang 471023, P. R. China.

<sup>c</sup> CAS Key Laboratory of Nano-Bio Interface, Suzhou Institute of Nano-Tech and Nano-Bionics, Chinese Academy of Sciences, Suzhou 215123, P. R. China;

Address correspondence to X.W: [xwang2008@vip.henu.edu.cn](mailto:xwang2008@vip.henu.edu.cn)

# These authors contributed equally.

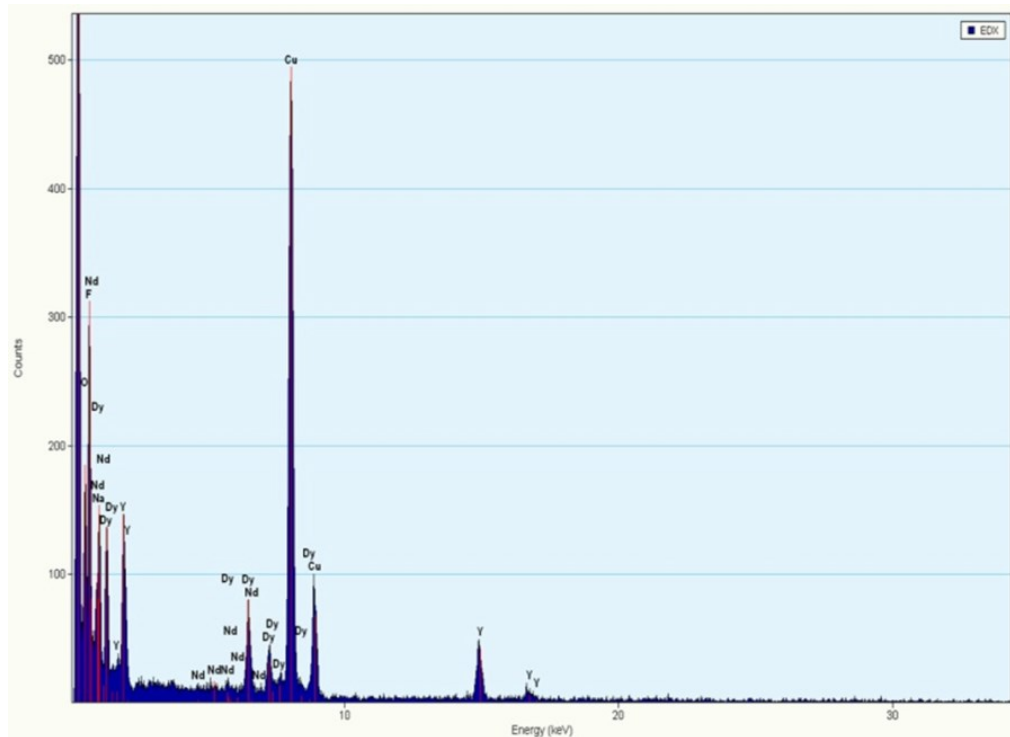

Fig. S1 The energy dispersive X-ray spectroscopy of NaYF<sub>4</sub>: Nd/NaDyF<sub>4</sub> NCs.

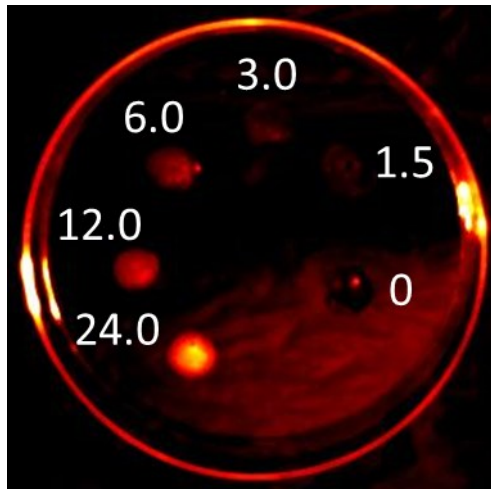

Fig. S2 The near-infrared fluorescence image of HeLa cells after being transfected with Lipo-NaYF<sub>4</sub>: Nd/ NaDyF<sub>4</sub> NCs using different concentration (0, 1.5, 3.0, 6.0, 12.0, 24.0 µg /mL).
